# Supplementary material for: The Nontypeable Haemophilus influenzae Major Adhesin Hia Is a Dual-Function Lectin That Binds to Human-Specific Respiratory Tract Sialic Acid Glycan Receptors
Source: PubMed Central journal article supplement (PMC7642680; doi:10.1128/mbio.02714-20), 2020-11-03

A)

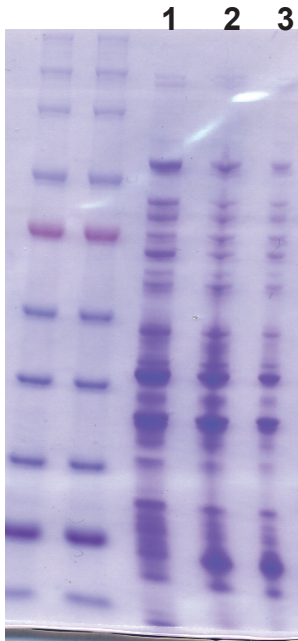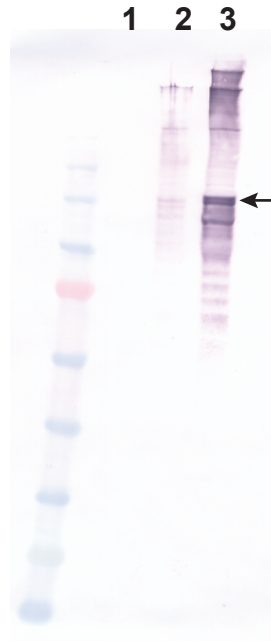

1. BL21 only
2. BL21 pET15b::Hia uninduced
3. BL21 pET15b::Hia induced

B)

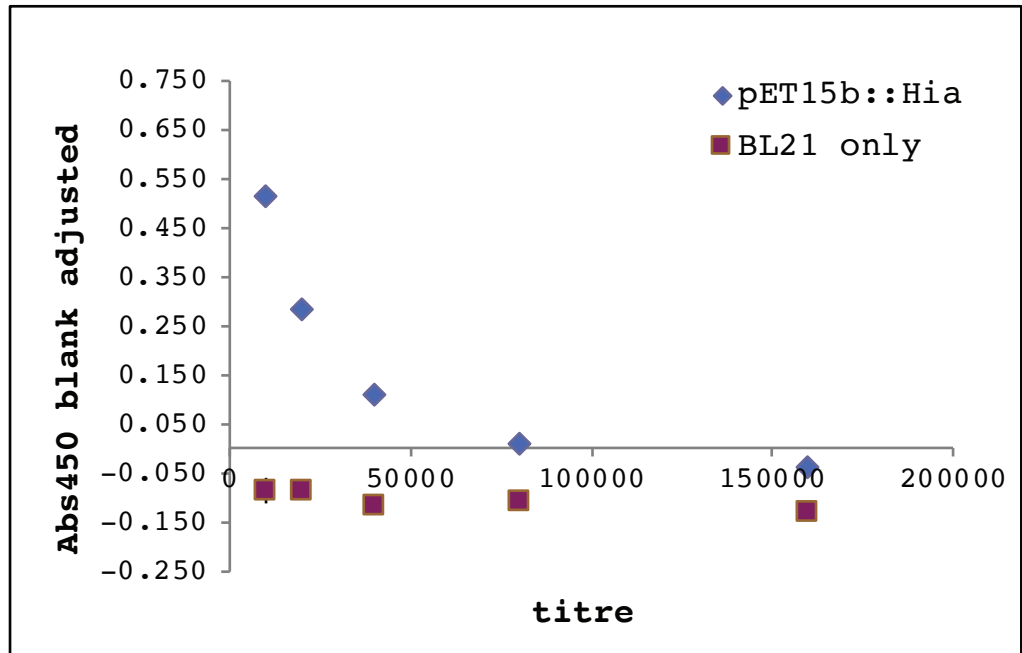

Supplement: mBio.02714-20-sf001.pdf [file mBio.02714-20-sf001.pdf]
