# Supplementary material for: The Nontypeable Haemophilus influenzae Major Adhesin Hia Is a Dual-Function Lectin That Binds to Human-Specific Respiratory Tract Sialic Acid Glycan Receptors
Source: PubMed Central journal article supplement (PMC7642680; doi:10.1128/mbio.02714-20), 2020-11-03
Supplement: mBio.02714-20-st002.pdf [file mBio.02714-20-st002.pdf]

| ID                        | Structure                                                             | Hia fold over BL21 control |
|---------------------------|-----------------------------------------------------------------------|----------------------------|
| <b>MONOSACCHARIDES</b>    |                                                                       |                            |
| 1                         | Fuca-sp3                                                              | 0.42                       |
| 2                         | Gala-sp3                                                              | 0.43                       |
| 3                         | Galβ-sp3                                                              | 0.60                       |
| 4                         | GalNAcα-sp0                                                           | 0.45                       |
| 5                         | GalNAcα-sp3                                                           | 0.37                       |
| 6                         | GalNAcβ-sp3                                                           | 0.40                       |
| 7                         | Glcα-sp3                                                              | 0.74                       |
| 9                         | Glcβ-sp3                                                              | 0.26                       |
| 10                        | GlcNAcβ-sp3                                                           | 0.30                       |
| 14                        | GlcN(Gc)β-sp4                                                         | 0.19                       |
| 15                        | HOCH <sub>2</sub> (HOCH) <sub>4</sub> CH <sub>2</sub> NH <sub>2</sub> | 0.47                       |
| 16                        | Manα-sp3                                                              | 0.51                       |
| 18                        | Manβ-sp4                                                              | 0.51                       |
| 19                        | ManNAcβ-sp4                                                           | 0.53                       |
| 20                        | Rhaα-sp3                                                              | 0.35                       |
| 22                        | GlcNAcβ-sp4                                                           | 0.25                       |
| 37                        | 3-O-Su-Galβ-sp3                                                       | 0.41                       |
| 38                        | 3-O-Su-GalNAcα-sp3                                                    | 0.50                       |
| 43                        | 6-O-Su-GlcNAcβ-sp3                                                    | 0.44                       |
| 44                        | GlcAα-sp3                                                             | 0.33                       |
| 45                        | GlcAβ-sp3                                                             | 0.36                       |
| 46                        | 6-H <sub>2</sub> PO <sub>3</sub> Glcβ-sp4                             | 0.43                       |
| 47                        | 6-H <sub>2</sub> PO <sub>3</sub> Manα-sp3                             | 3.92±0.61                  |
| 48                        | Neu5Aca-sp3                                                           | 6.22±0.93                  |
| 49                        | Neu5Aca-sp9                                                           | 5.61±0.97                  |
| 52                        | Neu5Gca-sp3                                                           | 0.34                       |
| 54                        | 9-NAc-Neu5Aca-sp3                                                     | 0.54                       |
| 55                        | 3-O-Su-GlcNAcβ-sp3                                                    | 0.60                       |
| <b>Terminal Galactose</b> |                                                                       |                            |
| 75                        | Galα1-2Galβ-sp3                                                       | 1.05                       |
| 76                        | Galα1-3Galβ-sp3                                                       | 1.21                       |
| 77                        | Galα1-3GalNAcβ-sp3                                                    | 1.06                       |
| 78                        | Galα1-3GalNAcα-sp3                                                    | 0.97                       |
| 80                        | Galα1-3GlcNAcβ-sp3                                                    | 1.20                       |
| 81                        | Galα1-4GlcNAcβ-sp3                                                    | 1.08                       |
| 83                        | Galα1-6Glcβ-sp4                                                       | 1.06                       |

|     |                                                   |           |
|-----|---------------------------------------------------|-----------|
| 84  | Galβ1-2Galβ-sp3                                   | 0.99      |
| 85  | Galβ1-3GlcNAcβ-sp3                                | 1.24      |
| 87  | Galβ1-3Galβ-sp3                                   | 1.01      |
| 88  | Galβ1-3GalNAcβ-sp3                                | 1.13      |
| 89  | Galβ1-3GalNAcα-sp3                                | 1.23      |
| 93  | Galβ1-4Glcβ-sp4                                   | 0.86      |
| 94  | Galβ1-4Galβ-sp4                                   | 1.07      |
| 97  | Galβ1-4GlcNAcβ-sp3                                | 1.05      |
| 100 | Galβ1-6Galβ-sp4                                   | 1.05      |
| 145 | Galβ1-3(6-O-Su)GlcNAcβ-sp3                        | 2.19±0.44 |
| 146 | Galβ1-4(6-O-Su)Glcβ-sp2                           | 1.24      |
| 147 | Galβ1-4(6-O-Su)GlcNAcβ-sp3                        | 2.41±0.39 |
| 150 | 3-O-Su-Galβ1-3GalNAcα-sp3                         | 0.96      |
| 151 | 6-O-Su-Galβ1-3GalNAcα-sp3                         | 0.90      |
| 152 | 3-O-Su-Galβ1-4Glcβ-sp2                            | 1.02      |
| 153 | 6-O-Su-Galβ1-4Glcβ-sp2                            | 0.94      |
| 155 | 3-O-Su-Galβ1-3GlcNAcβ-sp3                         | 0.94      |
| 157 | 3-O-Su-Galβ1-4GlcNAcβ-sp3                         | 0.88      |
| 159 | 4-O-Su-Galβ1-4GlcNAcβ-sp3                         | 0.84      |
| 161 | 6-O-Su-Galβ1-3GlcNAcβ-sp3                         | 0.98      |
| 163 | 6-O-Su-Galβ1-4GlcNAcβ-sp3                         | 0.83      |
| 176 | 3-O-Su-Galβ1-4(6-O-Su)Glcβ-sp2                    | 0.77      |
| 177 | 3-O-Su-Galβ1-4(6-O-Su)GlcNAcβ-sp2                 | 0.97      |
| 178 | 6-O-Su-Galβ1-4(6-O-Su)Glcβ-sp2                    | 1.00      |
| 179 | 6-O-Su-Galβ1-3(6-O-Su)GlcNAcβ-sp2                 | 0.89      |
| 180 | 6-O-Su-Galβ1-4(6-O-Su)GlcNAcβ-sp2                 | 0.63      |
| 181 | 3,4-O-Su <sub>2</sub> -Galβ1-4GlcNAcβ-sp3         | 0.92      |
| 182 | 3,6-O-Su <sub>2</sub> -Galβ1-4GlcNAcβ-sp2         | 0.92      |
| 183 | 4,6-O-Su <sub>2</sub> -Galβ1-4GlcNAcβ-sp2         | 0.88      |
| 184 | 4,6-O-Su <sub>2</sub> -Galβ1-4GlcNAcβ-sp3         | 1.18      |
| 189 | 3,6-O-Su <sub>2</sub> -Galβ1-4(6-O-Su)GlcNAcβ-sp2 | 0.60      |
| 201 | 3,4-O-Su <sub>2</sub> -Galβ1-4GlcNAcβ-sp3         | 0.91      |
| 203 | Galβ1-4(6-O-Su)GlcNAcβ-sp2                        | 0.87      |
| 220 | Galα1-3Galβ1-4Glcβ-sp2                            | 0.78      |
| 222 | Galα1-3Galβ1-4GlcNAcβ-sp3                         | 0.89      |
| 224 | Galα1-4Galβ1-4Glcβ-sp3                            | 0.89      |
| 225 | Galα1-4Galβ1-4GlcNAc-sp2                          | 0.93      |
| 228 | Galβ1-2Galα1-4GlcNAcβ-sp4                         | 0.88      |

|     |                                                |      |
|-----|------------------------------------------------|------|
| 229 | Galβ1-3Galβ1-4GlcNAcβ-sp4                      | 0.73 |
| 231 | Galβ1-4GlcNAcβ1-3GalNAcα-sp3                   | 0.77 |
| 232 | Galβ1-4GlcNAcβ1-6GalNAcα-sp3                   | 1.21 |
| 254 | Galβ1-3(GlcNAcβ1-6)GalNAcα-sp3                 | 1.16 |
| 262 | Galβ1-3GalNAcβ1-3Gal-sp4                       | 0.80 |
| 264 | Galβ1-4Galβ1-4GlcNAc-sp3                       | 0.99 |
| 373 | Galα1-3Galβ1-4GlcNAcβ1-3Galβ-sp3               | 1.21 |
| 375 | Galα1-4GlcNAcβ1-3Galβ1-4GlcNAcβ-sp3            | 0.96 |
| 376 | Galβ1-3GlcNAcβ1-3Galβ1-4Glcβ-sp4               | 1.19 |
| 377 | Galβ1-3GlcNAcβ1-3Galβ1-3GlcNAcβ-sp2            | 1.02 |
| 378 | Galβ1-3GlcNAcα1-3Galβ1-4GlcNAcβ-sp3            | 1.20 |
| 379 | Galβ1-3GlcNAcβ1-3Galβ1-4GlcNAcβ-sp3            | 1.24 |
| 380 | Galβ1-3GlcNAcα1-6Galβ1-4GlcNAcβ-sp2            | 0.77 |
| 381 | Galβ1-3GlcNAcβ1-6Galβ1-4GlcNAcβ-sp2            | 1.04 |
| 382 | Galβ1-3GalNAcβ1-4Galβ1-4Glcβ-sp3               | 1.10 |
| 383 | Galβ1-4GlcNAcβ1-3Galβ1-4Glcβ-sp2               | 1.14 |
| 385 | Galβ1-4GlcNAcβ1-3Galβ1-4GlcNAcβ-sp3            | 1.05 |
| 387 | Galβ1-4GlcNAcβ1-6Galβ1-4GlcNAcβ-sp2            | 1.12 |
| 388 | Galβ1-4GlcNAcβ1-6(Galβ1-3)GalNAcα-sp3          | 1.14 |
| 504 | (A-GN-M) <sub>2</sub> -3,6-M-GN-GNβ-sp4        | 0.88 |
| 1A  | Galβ1-3GlcNAc                                  | 1.26 |
| 1B  | Galβ1-4GlcNAc                                  | 1.04 |
| 1C  | Galβ1-4Gal                                     | 1.11 |
| 1D  | Galβ1-6GlcNAc                                  | 1.16 |
| 1E  | Galβ1-3GalNAc                                  | 1.04 |
| 1F  | Galβ1-3GalNAcβ1-4Galβ1-4Glc                    | 1.11 |
| 1G  | Galβ1-3GlcNAcβ1-3Galβ1-4Glc                    | 0.91 |
| 1H  | Galβ1-4GlcNAcβ1-3Galβ1-4Glc                    | 1.10 |
| 1I  | Galβ1-4GlcNAcβ1-6(Galβ1-4GlcNAcβ1-3)Galβ1-4Glc | 1.05 |
| 1J  | Galβ1-4GlcNAcβ1-6(Galβ1-3GlcNAcβ1-3)Galβ1-4Glc | 1.02 |
| 1K  | Galα1-4Galβ1-4Glc                              | 0.99 |
| 1L  | GalNAcα1-O-Ser                                 | 1.04 |
| 1M  | Galβ1-3GalNAcα1-O-Ser                          | 1.02 |
| 1N  | Galα1-3Gal                                     | 0.77 |
| 1O  | Galα1-3Galβ1-4GlcNAc                           | 1.04 |
| 1P  | Galα1-3Galβ1-4Glc                              | 0.98 |
| 2A  | Galα1-3Galβ1-4Galα1-3Gal                       | 1.22 |
| 2B  | Galβ1-6Gal                                     | 1.20 |

|                                       |                                                                    |      |
|---------------------------------------|--------------------------------------------------------------------|------|
| 2C                                    | GalN Acβ1-3Gal                                                     | 1.03 |
| 2D                                    | GalN Acβ1-4Gal                                                     | 0.93 |
| 2E                                    | Galα1-4Galβ1-4GlcN Ac                                              | 1.03 |
| 2F                                    | GalNAcα1-3Galβ1-4Glc                                               | 1.01 |
| 2G                                    | Galβ1-3GlcN Acβ1-3Galβ1-4GlcN Acβ1-6(Galβ1-3GlcN Acβ1-3)Galβ1-4Glc | 0.82 |
| 2H                                    | Galβ1-3GlcN Acβ1-3Galβ1-4GlcN Acβ1-3Galβ1-4Glc                     | 0.99 |
| 18B                                   | Galβ1-3GalNAcβ1-3Galα1-4Galβ1-4Glc                                 | 0.85 |
| 18C                                   | Galβ1-3GalNAcβ1-3Gal                                               | 1.12 |
| 18L                                   | Galβ1-4Glc                                                         | 1.23 |
| 18M                                   | Galβ1-4Gal                                                         | 0.83 |
| 18N                                   | Galβ1-6Gal                                                         | 1.00 |
| <b>Terminal N-Acetylgalactosamine</b> |                                                                    |      |
| 101                                   | GalNAcα1-3GalNAcβ-sp3                                              | 1.05 |
| 102                                   | GalNAcα1-3Galβ-sp3                                                 | 0.95 |
| 103                                   | GalNAcα1-3GalNAcα-sp3                                              | 1.17 |
| 104                                   | GalNAcβ1-3Galβ-sp3                                                 | 1.16 |
| 106                                   | GalNAcβ1-4GlcNAcβ-sp3                                              | 1.12 |
| 192                                   | GalNAcβ1-4(6-O-Su)GlcNAcβ-sp3                                      | 1.10 |
| 193                                   | 3-O-Su-GalNAcβ1-4GlcNAcβ-sp3                                       | 1.23 |
| 194                                   | 6-O-Su-GalNAcβ1-4GlcNAcβ-sp3                                       | 1.17 |
| 195                                   | 6-O-Su-GalNAcβ1-4-(3-O-Su)GlcNAcβ-sp3                              | 0.81 |
| 196                                   | 3-O-Su-GalNAcβ1-4(3-O-Su)-GlcNAcβ-sp3                              | 1.14 |
| 197                                   | 3,6-O-Su <sub>2</sub> -GalNAcβ1-4GlcNAcβ-sp3                       | 1.22 |
| 198                                   | 4,6-O-Su <sub>2</sub> -GalNAcβ1-4GlcNAcβ-sp3                       | 1.20 |
| 199                                   | 4,6-O-Su <sub>2</sub> -GalNAcβ1-4-(3-O-Ac)GlcNAcβ-sp3              | 0.95 |
| 200                                   | 4-O-Su-GalNAcβ1-4GlcNAcβ-sp3                                       | 1.00 |
| 202                                   | 6-O-Su-GalNAcβ1-4(6-O-Su)GlcNAcβ-sp3                               | 0.92 |
| 204                                   | 4-O-Su-GalNAcβ1-4GlcNAcβ-sp2                                       | 1.00 |
| 238                                   | GalNAcβ1-4Galβ1-4Glcβ-sp3                                          | 1.03 |
| 389                                   | GalNAcβ1-3Galα1-4Galβ1-4Glcβ-sp3                                   | 1.07 |
| 1L                                    | GalN Acα1-O-Ser                                                    | 1.16 |
| 2C                                    | GalN Acβ1-3Gal                                                     | 0.99 |
| 2D                                    | GalN Acβ1-4Gal                                                     | 1.10 |
| 2F                                    | GalNAcα1-3Galβ1-4Glc                                               | 1.21 |
| <b>Fucosylated</b>                    |                                                                    |      |
| 71                                    | Fucα1-2Galβ-sp3                                                    | 1.08 |
| 72                                    | Fucα1-3GlcNAcβ-sp3                                                 | 0.78 |
| 73                                    | Fucα1-4GlcNAcβ-sp3                                                 | 1.10 |

|     |                                                                   |      |
|-----|-------------------------------------------------------------------|------|
| 215 | Fuca1-2Galβ1-3GlcNAcβ-sp3                                         | 1.02 |
| 216 | Fuca1-2Galβ1-4GlcNAcβ-sp3                                         | 1.01 |
| 217 | Fuca1-2Galβ1-3GalNAcα-sp3                                         | 1.12 |
| 219 | Fuca1-2Galβ1-4Glcβ-sp4                                            | 1.07 |
| 226 | Fuca1-2(Galα1-3)Galβ-sp3                                          | 0.99 |
| 233 | Galβ1-3(Fuca1-4)GlcNAcβ-sp3                                       | 0.92 |
| 234 | Fuca1-3(Galβ1-4)GlcNAcβ-sp3                                       | 0.91 |
| 235 | Fuca1-2(GalNAcα1-3)Galβ-sp3                                       | 1.10 |
| 287 | 3-O-Su-Galβ1-3(Fuca1-4)GlcNAcβ-sp3                                | 0.95 |
| 288 | Fuca1-3(3-O-Su-Galβ1-4)GlcNAcβ-sp3                                | 1.03 |
| 359 | Fuca1-2(Galα1-3)Galβ1-3GlcNAcβ-sp3                                | 1.09 |
| 360 | Fuca1-2(Galα1-3)Galβ1-4GlcNAcβ-sp3                                | 1.19 |
| 362 | Fuca1-2(Galα1-3)Galβ1-3GalNAcα-sp3                                | 0.68 |
| 363 | Fuca1-2(Galα1-3)Galβ1-3GalNAcβ-sp3                                | 1.17 |
| 364 | Fuca1-3(Galα1-3Galβ1-4)GlcNAcβ-sp3                                | 0.86 |
| 366 | Fuca1-2(GalNAcα1-3)Galβ1-3GlcNAcβ-sp3                             | 0.98 |
| 368 | Fuca1-2(GalNAcα1-3)Galβ1-4GlcNAcβ-sp3                             | 1.12 |
| 371 | Fuca1-2Galβ1-3(Fuca1-4)GlcNAcβ-sp3                                | 0.82 |
| 372 | Fuca1-3(Fuca1-2Galβ1-4)GlcNAcβ-sp3                                | 0.90 |
| 392 | Fuca1-2(GalNAcα1-3)Galβ1-3GalNAcα-sp3                             | 1.15 |
| 479 | Fuca1-2Galβ1-3GlcNAcβ1-3Galβ1-4Glcβ-sp4                           | 1.06 |
| 480 | Fuca1-2Galβ1-3GlcNAcβ1-3Galβ1-4GlcNAcβ-sp2                        | 1.24 |
| 483 | Fuca1-3(Fuca1-2 (Galα1-3)Galβ1-4)GlcNAcβ-sp3                      | 0.83 |
| 496 | Fuca1-2Galβ1-3(Fuca1-4)GlcNAcβ1-3Galβ1-4Glcβ-sp4                  | 0.90 |
| 497 | Fuca1-3(Fuca1-2Galβ1-4)GlcNAcβ1-3Galβ1-4Glcβ-sp4                  | 1.00 |
| 538 | Le <sup>x</sup> 1-6'(Le <sup>c</sup> 1-3')Lac-sp4                 | 0.98 |
| 539 | LacNAc1-6'(Le <sup>d</sup> 1-3')Lac-sp4                           | 0.90 |
| 541 | Le <sup>x</sup> 1-6'(Le <sup>d</sup> 1-3')Lac-sp4                 | 1.08 |
| 542 | Le <sup>c</sup> Le <sup>x</sup> 1-6'(Le <sup>c</sup> 1-3')Lac-sp4 | 0.68 |
| 543 | Le <sup>x</sup> 1-6'(Le <sup>b</sup> 1-3')Lac-sp4                 | 0.86 |
| 7A  | Fuca1-2Galβ1-3GlcNAcβ1-3Galβ1-4Glc                                | 1.13 |
| 7B  | Galβ1-3(Fuca1-4)GlcNAcβ1-3Galβ1-4Glc                              | 0.83 |
| 7C  | Galβ1-4(Fuca1-3)GlcNAcβ1-3Galβ1-4Glc                              | 0.87 |
| 7D  | Fuca1-2Galβ1-3(Fuca1-4)GlcNAcβ1-3Galβ1-4Glc                       | 1.23 |
| 7E  | Galβ1-3(Fuca1-4)GlcNAcβ1-3Galβ1-4(Fuca1-3)Glc                     | 1.14 |
| 7F  | Fuca1-2Gal                                                        | 0.73 |
| 7G  | Fuca1-2Galβ1-4Glc                                                 | 1.00 |
| 7H  | Galβ1-4(Fuca1-3)Glc                                               | 0.94 |

|                   |                                                                                 |           |
|-------------------|---------------------------------------------------------------------------------|-----------|
| 7I                | Galβ1-4(Fuca1-3)GlcN Ac                                                         | 0.90      |
| 7J                | Galβ1-3(Fuca1-4)GlcN Ac                                                         | 0.99      |
| 7K                | GalN Aca1-3(Fuca1-2)Gal                                                         | 0.85      |
| 7L                | Fuca1-2Galβ1-4(Fuca1-3)Glc                                                      | 0.81      |
| 7M                | Galβ1-3(Fuca1-2)Gal                                                             | 0.91      |
| 7N                | Fuca1-2Galβ1-4(Fuca1-3)GlcN Ac                                                  | 1.17      |
| 7O                | Fuca1-2Galβ1-3GlcN Ac                                                           | 1.09      |
| 7P                | Fuca1-2Galβ1-3(Fuca1-4)GlcN Ac                                                  | 1.01      |
| 8A                | SO <sub>3</sub> -3Galβ1-3(Fuca1-4)GlcN Ac                                       | 0.99      |
| 8B                | SO <sub>3</sub> -3Galβ1-4(Fuca1-3)GlcN Ac                                       | 0.97      |
| 8C                | Galβ1-3GlcN Acβ1-3Galβ1-4(Fuca1-3)GlcN Acβ1-3Galβ1-4Glc                         | 0.76      |
| 8D                | Galβ1-4(Fuca1-3)GlcN Acβ1-6(Galβ1-3GlcN Acβ1-3)Galβ1-4Glc                       | 1.01      |
| 8E                | Galβ1-4(Fuca1-3)GlcN Acβ1-6(Fuca1-2Galβ1-3GlcN Acβ1-3)Galβ1-4Glc                | 0.97      |
| 8F                | Galβ1-4(Fuca1-3)GlcN Acβ1-6(Fuca1-2Galβ1-3(Fuca1-4)GlcN Acβ1-3)Galβ1-4Glc       | 0.90      |
| 8G                | Galβ1-4GlcNAcβ1-3Galβ1-4(Fuca1-3)Glc                                            | 1.01      |
| 8H                | Fuca1-2Galβ1-4(Fuca1-3)GlcNAcβ1-3Galβ1-4Glc                                     | 0.76      |
| 8I                | Fuca1-3Galβ1-4GlcNAcβ1-3Galβ1-4(Fuca1-3)Glc                                     | 1.11      |
| 8J                | Fuca1-2Galβ1-4(Fuca1-3)GlcNAcβ1-3(Fuca1-2)Galβ1-4Glc                            | 0.76      |
| 8K                | Galβ1-4(Fuca1-3)GlcNAcβ1-6(Galβ1-4GlcNAcβ1-3)Galβ1-4Glc                         | 1.17      |
| 8L                | Galβ1-4(Fuca1-3)GlcNAcβ1-6(Galβ1-4(Fuca1-3)GlcNAcβ1-3)Galβ1-4Glc                | 0.86      |
| 8M                | Fuca1-2Galβ1-4(Fuca1-3)GlcNAcβ1-6(Galβ1-4GlcNAcβ1-3)Galβ1-4Glc                  | 0.98      |
| 8N                | Galβ1-3GlcNAcβ1-3Galβ1-4(Fuca1-3)GlcNAcβ1-6(Galβ1-3GlcNAcβ1-3)Galβ1-4Glc        | 0.66      |
| 8O                | Fuca1-2Galβ1-3GlcNAcβ1-3Galβ1-4(Fuca1-3)GlcNAcβ1-6(Galβ1-3GlcNAcβ1-3)Galβ1-4Glc | 0.94      |
| 8P                | GalNAcβ1-3(Fuca1-2)Galβ1-4Glc                                                   | 1.00      |
| 9A                | Galβ1-3(Fuca1-2)Galβ1-4(Fuca1-3)Glc                                             | 1.22      |
| 9B                | Galβ1-4GlcNAcβ1-6(Fuca1-2Galβ1-3GlcNAcβ1-3)Galβ1-4Glc                           | 0.81      |
| 18D               | Galα1-3(Fuca1-2)Galβ1-4Glc                                                      | 0.96      |
| 18E               | GalNAca1-3(Fuca1-2)Galβ1-4(Fuca1-3)Glc                                          | 0.87      |
| 19J               | Galβ1-4(Fuca1-3)GlcNAcβ1-3Gal                                                   | 1.02      |
| 19L               | Fuca1-2Galβ1-4(Fuca1-3)GlcNAcβ1-3Gal                                            | 0.93      |
| 19M               | Galβ1-3(Fuca1-4)GlcNAcβ1-3Gal                                                   | 0.87      |
| 19N               | Fuca1-2Galβ1-3(Fuca1-4)GlcNAcβ1-3Gal                                            | 0.70      |
| <b>Sialylated</b> |                                                                                 |           |
| 169               | Neu5Aca2-3Galβ-sp3                                                              | 1.29      |
| 170               | Neu5Aca2-6Galβ-sp3                                                              | 8.84±1.47 |
| 171               | Neu5Aca2-3GalNAca-sp3                                                           | 1.30      |
| 172               | Neu5Aca2-6GalNAca-sp3                                                           | 1.95      |
| 174               | Neu5Gca2-6GalNAca-sp3                                                           | 1.58      |

|     |                                                                |           |
|-----|----------------------------------------------------------------|-----------|
| 186 | Neu5Aca2-8Neu5Aca2-sp3                                         | 1.78      |
| 205 | Neu5Aca2-6GalNAcβ-sp3                                          | 9.34±1.69 |
| 206 | Neu5Gca2-3Gal-sp3                                              | 1.27      |
| 289 | Galα1-3(Neu5Aca2-6)GalNAcα-sp3                                 | 1.36      |
| 290 | Galβ1-3(Neu5Aca2-6) GalNAcα-sp3                                | 1.19      |
| 292 | Neu5Aca2-3Galβ1-3GalNAcα-sp3                                   | 1.60      |
| 293 | Neu5Aca2-3Galβ1-4Glcβ-sp3                                      | 1.59      |
| 294 | Neu5Aca2-3Galβ1-4Glcβ-sp4                                      | 1.69      |
| 295 | Neu5Aca2-6Galβ1-4Glcβ-sp2                                      | 1.56      |
| 298 | Neu5Aca2-3Galβ1-4GlcNAcβ-sp3                                   | 3.34±0.89 |
| 299 | Neu5Aca2-3Galβ1-3GlcNAcβ-sp3                                   | 1.81      |
| 300 | Neu5Aca2-6Galβ1-4GlcNAcβ-sp3                                   | 1.82      |
| 303 | Neu5Gca2-3Galβ1-4GlcNAcβ-sp3                                   | 1.33      |
| 304 | Neu5Gca2-6Galβ1-4GlcNAcβ-sp3                                   | 1.45      |
| 306 | 9-NAc-Neu5Aca2-6Galβ1-4GlcNAcβ-sp3                             | 1.29      |
| 315 | Neu5Aca2-3Galβ1-4-(6-O-Su)GlcNAcβ-sp3                          | 1.84      |
| 317 | Neu5Aca2-3Galβ1-3-(6-O-Su)GalNAcβ-sp3                          | 1.57      |
| 318 | Neu5Aca2-6Galβ1-4-(6-O-Su)GlcNAcβ-sp3                          | 9.44±2.21 |
| 319 | Neu5Aca2-3-(6-O-Su)Galβ1-4GlcNAcβ-sp3                          | 4.37±0.67 |
| 321 | (Neu5Aca2-8) <sub>3</sub> -sp3                                 | 1.38      |
| 323 | Neu5Aca2-6Galβ1-3GlcNAc-sp3                                    | 1.20      |
| 324 | Neu5Aca2-6Galβ1-3(6-O-Su)GlcNAc-sp3                            | 1.32      |
| 331 | Neu5Gca2-3Galβ1-3GlcNAcβ-sp3                                   | 1.48      |
| 421 | Neu5Aca2-3(GalNAcβ1-4)Galβ1-4Glcβ-sp2                          | 1.26      |
| 422 | Neu5Aca2-3Galβ1-4GlcNAcβ1-3Galβ-sp3                            | 1.33      |
| 423 | Fuca1-3(Neu5Aca2-3Galβ1-4)GlcNAcβ-sp3                          |           |
| 426 | Neu5Aca2-3Galβ1-3(Fuca1-4)GlcNAcβ-sp3                          | 1.28      |
| 428 | Fuca1-3(Neu5Aca2-3Galβ1-4)6-O-Su-GlcNAcβ-sp3                   | 1.40      |
| 429 | Fuca1-3(Neu5Aca2-3(6-O-Su)Galβ1-4)GlcNAcβ-sp3                  | 1.39      |
| 433 | Neu5Aca2-3Galβ1-3(Neu5Aca2-6)GalNAcα-sp3                       | 1.31      |
| 434 | Neu5Aca2-8Neu5Aca2-3Galβ1-4Glcβ-sp4                            | 1.22      |
| 527 | Neu5Aca2-3Galβ1-4GlcNAcβ1-3Galβ1-4GlcNAcβ-sp2                  | 1.34      |
| 528 | Fuca1-3(Neu5Aca2-3 Galβ1-4)GlcNAcβ1-3Galβ-sp3                  | 4.33±1.12 |
| 529 | Neu5Aca2-6(Galβ1-3)GlcNAcβ1-3Galβ1-4Glcβ-sp4                   | 1.46      |
| 531 | GalNAcβ1-4(Neu5Aca2-8Neu5Aca2-3)Galβ1-4Glc-sp2                 | 1.29      |
| 532 | Neu5Aca2-8Neu5Aca2-8Neu5Aca2-3Galβ1-4Glc-sp2                   | 1.48      |
| 533 | (Neu5Aca2-8) <sub>2</sub> Neu5Aca2-3(GalNAcβ1-4)Galβ1-4Glc-sp2 | 1.55      |
| 534 | Neu5Aca2-3Galβ1-4GlcNAcβ1-3Galβ1-4GlcNAcβ-sp3                  | 1.47      |

|                |                                                                                                   |            |
|----------------|---------------------------------------------------------------------------------------------------|------------|
| 536            | Neu5Aca2-3Galβ1-3GlcNAcβ1-3Galβ1-4Glcβ-sp4                                                        | 1.86       |
| 537            | Neu5Aca2-3Galβ1-4GlcNAcβ1-3Galβ1-4Glcβ-sp4                                                        | 1.77       |
| 540            | Le <sup>x</sup> 1-6'(6'SLN1-3')Lac-sp4                                                            | 1.56       |
| 10A            | Neu5Aca2-3Galβ1-3(Fuca1-4)GlcNAc                                                                  | 1.62       |
| 10B            | Neu5Aca2-3Galβ1-4(Fuca1-3)GlcNAc                                                                  | 1.62       |
| 10C            | Neu5Aca2-3Galβ1-3GlcNAcβ1-3Galβ1-4Glc                                                             | 1.66       |
| 10D            | Galβ1-4(Fuca1-3)GlcNAcβ1-6(Neu5Aca2-6Galβ1-4GlcNAcβ1-3)Galβ1-4Glc                                 | 1.45       |
| 10E            | Neu5Aca2-3Galβ1-3(Neu5Aca2-6)GalNAc                                                               | 1.33       |
| 10H            | Neu5Aca2-6Galβ1-3GlcNAcβ1-3Galβ1-4(Fuca1-3)Glc                                                    | 7.47±1.42  |
| 10I            | Galβ1-3GlcNAcβ1-3(Neu5Aca2-6Galβ1-4GlcNAcβ1-6)Galβ1-4Glc                                          | 1.51       |
| 10J            | Neu5Aca2-6Galβ1-3GlcNAcβ1-3(Galβ1-4GlcNAcβ1-6)Galβ1-4Glc                                          | 1.59       |
| 10K            | Neu5Aca2-3Galβ1-4GlcNAc                                                                           | 1.18       |
| 10L            | Neu5Aca2-6Galβ1-4GlcNAc                                                                           | 11.56±2.37 |
| 10M            | Neu5Aca2-3Galβ1-3GlcNAcβ1-3Galβ1-4Glc                                                             | 1.49       |
| 10N            | Galβ1-3(Neu5Aca2-6)GlcNAcβ1-3Galβ1-4Glc                                                           | 1.32       |
| 10O            | Neu5Aca2-6Galβ1-4GlcNAcβ1-3Galβ1-4Glc                                                             | 1.97       |
| 10P            | Neu5Aca2-3Galβ1-3(Neu5Aca2-6)GlcNAcβ1-3Galβ1-4Glc                                                 | 1.80       |
| 11A            | Neu5Aca2-3Galβ1-4Glc                                                                              | 1.67       |
| 11B            | Neu5Aca2-6Galβ1-4Glc                                                                              | 1.94       |
| 11C            | (Neu5Aca2-8Neu5Ac) <sub>n</sub> (n<50)                                                            | 1.29       |
| 11D            | Neu5Aca2-6Galβ1-4GlcNAcβ1-2Manα1-6(Neu5Aca2-6Galβ1-4GlcNAcβ1-2Manα1-6)Manβ1-4GlcNAcβ1-4GlcNAc-Asn | 1.90       |
| 18A            | Neu5Aca2-3Galβ1-4GlcNAcβ1-3Galβ1-4Glc                                                             | 1.93       |
| 18K            | 9-NAc-Neu5Ac                                                                                      | 1.63       |
| 18O            | Neu5Ge                                                                                            | 1.32       |
| 19K            | Neu5Aca2-3Galβ1-4(Fuca1-3)GlcNAcβ1-3Gal                                                           | 1.24       |
| <b>Mannose</b> |                                                                                                   |            |
| 119            | Manα1-2Manβ-sp4                                                                                   | 0.79       |
| 120            | Manα1-3Manβ-sp4                                                                                   | 1.17       |
| 121            | Manα1-4Manβ-sp4                                                                                   | 0.94       |
| 122            | Manα1-6Manβ-sp4                                                                                   | 1.24       |
| 123            | Manβ1-4GlcNAcβ-sp4                                                                                | 1.48       |
| 124            | Manα1-2Manα-sp4                                                                                   | 0.73       |
| 258            | Manα1-3(Manα1-6)Manβ-sp4                                                                          | 1.38       |
| 495            | Manα1-3(Manα1-3(Manα1-6)Manα1-6)Manβ-sp4                                                          | 0.92       |
| 5A             | GlcNAcβ1-2Man                                                                                     | 1.36       |
| 5B             | GlcNAcβ1-2Manα1-6(GlcNAcβ1-2Manα1-3)Man                                                           | 1.39       |
| 5C             | Manα1-2Man                                                                                        | 0.92       |
| 5D             | Manα1-3Man                                                                                        | 1.03       |



|                                     |                                                                                                  |      |
|-------------------------------------|--------------------------------------------------------------------------------------------------|------|
| 5E                                  | Man $\alpha$ 1-4Man                                                                              | 0.95 |
| 5F                                  | Man $\alpha$ 1-6Man                                                                              | 1.48 |
| 5G                                  | Man $\alpha$ 1-6(Man $\alpha$ 1-3)Man                                                            | 0.98 |
| 5H                                  | Man $\alpha$ 1-6(Man $\alpha$ 1-3)Man $\alpha$ 1-6(Man $\alpha$ 1-3)Man                          | 0.93 |
| <b>Terminal N-Acetylglucosamine</b> |                                                                                                  |      |
| 113                                 | GlcNAc $\beta$ 1-3GalNAc $\alpha$ -sp3                                                           | 0.84 |
| 114                                 | GlcNAc $\beta$ 1-3Man $\beta$ -sp4                                                               | 1.04 |
| 115                                 | GlcNAc $\beta$ 1-4GlcNAc $\beta$ -Asn                                                            | 0.84 |
| 117                                 | GlcNAc $\beta$ 1-4GlcNAc $\beta$ -sp4                                                            | 0.94 |
| 118                                 | GlcNAc $\beta$ 1-6GalNAc $\alpha$ -sp3                                                           | 0.83 |
| 149                                 | GlcNAc $\beta$ 1-4(6-O-Su)GlcNAc $\beta$ -sp2                                                    | 0.85 |
| 167                                 | GlcNAc $\beta$ 1-4-[HOOC(CH <sub>3</sub> )CH]-3-O-GlcNAc $\beta$ -sp4                            | 1.05 |
| 168                                 | GlcNAc $\beta$ 1--[HOOC(CH <sub>3</sub> )CH]-3-O-GlcNAc $\beta$ -L-alanyl-D-i-glutaminy-L-lysine | 0.92 |
| 246                                 | GlcNAc $\beta$ 1-2Gal $\beta$ 1-3GalNAc $\alpha$ -sp3                                            | 0.87 |
| 247                                 | GlcNAc $\beta$ 1-3Gal $\beta$ 1-3GalNAc $\alpha$ -sp3                                            | 0.82 |
| 248                                 | GlcNAc $\beta$ 1-3Gal $\beta$ 1-4Glc $\beta$ -sp2                                                | 0.93 |
| 250                                 | GlcNAc $\beta$ 1-3Gal $\beta$ 1-4GlcNAc $\beta$ -sp3                                             | 0.96 |
| 251                                 | GlcNAc $\beta$ 1-4Gal $\beta$ 1-4GlcNAc $\beta$ -sp2                                             | 1.08 |
| 252                                 | GlcNAc $\beta$ 1-4GlcNAc $\beta$ 1-4GlcNAc $\beta$ -sp4                                          | 0.81 |
| 253                                 | GlcNAc $\beta$ 1-6Gal $\beta$ 1-4GlcNAc $\beta$ -sp2                                             | 0.70 |
| 255                                 | GlcNAc $\beta$ 1-3(GlcNAc $\beta$ 1-6)GalNAc $\alpha$ -sp3                                       | 1.03 |
| 395                                 | GlcNAc $\beta$ 1-3(GlcNAc $\beta$ 1-6)Gal $\beta$ 1-4GlcNAc $\beta$ -sp3                         | 1.14 |
| 493                                 | (GlcNAc $\beta$ 1-4) <sub>5</sub> $\beta$ -sp4                                                   | 1.04 |
| 503                                 | (GlcNAc $\beta$ 1-4) <sub>6</sub> $\beta$ -sp4                                                   | 1.09 |
| 505                                 | (GN-M) <sub>2</sub> -3,6-M-GN-GN $\beta$ -sp4                                                    | 1.21 |
| 4A                                  | GlcNAc $\beta$ 1-4GlcNAc                                                                         | 1.06 |
| 4B                                  | GlcNAc $\beta$ 1-4GlcNAc $\beta$ 1-4GlcNAc                                                       | 0.93 |
| 4C                                  | GlcNAc $\beta$ 1-4GlcNAc $\beta$ 1-4GlcNAc $\beta$ 1-4GlcNAc                                     | 0.74 |
| 4D                                  | GlcNAc $\beta$ 1-4GlcNAc $\beta$ 1-4GlcNAc $\beta$ 1-4GlcNAc $\beta$ 1-4GlcNAc $\beta$ 1-4GlcNAc | 0.95 |
| 4E                                  | Bacterial cell wall muramyl disaccharide                                                         | 0.89 |
| 4F                                  | GlcNAc $\beta$ 1-4GlcNAc $\beta$ 1-4GlcNAc $\beta$ 1-4GlcNAc $\beta$ 1-4GlcNAc                   | 0.97 |
| 18G                                 | 6-O-Su-GlcNAc                                                                                    | 0.73 |
| 18H                                 | GlcNAc                                                                                           | 1.06 |
| <b>Glucose</b>                      |                                                                                                  |      |
| 110                                 | Glc $\alpha$ 1-4Glc $\beta$ -sp3                                                                 | 1.24 |
| 111                                 | Glc $\beta$ 1-4Glc $\beta$ -sp4                                                                  | 1.03 |
| 112                                 | Glc $\beta$ 1-6Glc $\beta$ -sp4                                                                  | 0.96 |
| 164                                 | GlcA $\beta$ 1-3GlcNAc $\beta$ -sp3                                                              | 0.93 |

|                                                                     |                                                                    |           |
|---------------------------------------------------------------------|--------------------------------------------------------------------|-----------|
| 165                                                                 | GlcA $\beta$ 1-3Gal $\beta$ -sp3                                   | 0.85      |
| 166                                                                 | GlcA $\beta$ 1-6Gal $\beta$ -sp3                                   | 0.85      |
| 240                                                                 | (Glc $\alpha$ 1-4) <sub>3</sub> $\beta$ -sp4                       | 0.97      |
| 241                                                                 | (Glc $\alpha$ 1-6) <sub>3</sub> $\beta$ -sp4                       | 0.90      |
| 390                                                                 | (Glc $\alpha$ 1-4) <sub>4</sub> $\beta$ -sp4                       | 0.76      |
| 391                                                                 | (Glc $\alpha$ 1-6) <sub>4</sub> $\beta$ -sp4                       | 0.87      |
| 492                                                                 | (Glc $\alpha$ 1-6) <sub>5</sub> $\beta$ -sp4                       | 0.87      |
| 502                                                                 | (Glc $\alpha$ 1-6) <sub>6</sub> $\beta$ -sp4                       | 0.66      |
| 18I                                                                 | GlcA                                                               | 0.84      |
| 18J                                                                 | 6-O-(H <sub>2</sub> PO <sub>4</sub> )-Glc                          | 1.08      |
| 19O                                                                 | Glc $\alpha$ 1-4Glc $\alpha$ 1-4                                   | 0.84      |
| 19P                                                                 | Glc $\alpha$ 1-4Glc $\alpha$ 1-4Glc $\alpha$ 1-4                   | 0.84      |
| <b>Low molecular weight Carageenan and Glycoaminoglycans (GAGS)</b> |                                                                    |           |
| 12A                                                                 | Neocarratetraose-41, 3-di-O-sulphate (Na <sup>+</sup> )            | 0.93      |
| 12B                                                                 | Neocarratetraose-41-O-sulphate (Na <sup>+</sup> )                  | 2.36±0.67 |
| 12C                                                                 | Neocarrahexaose-24,41, 3, 5-tetra-O-sulphate (Na <sup>+</sup> )    | 1.08      |
| 12D                                                                 | Neocarrahexaose-41, 3, 5-tri-O-sulphate (Na <sup>+</sup> )         | 2.43±0.71 |
| 12E                                                                 | Neocarraoctaose-41, 3, 5, 7-tetra-O-sulphate (Na <sup>+</sup> )    | 0.73      |
| 12F                                                                 | Neocarradecaose-41, 3, 5, 7, 9-penta-O-sulphate (Na <sup>+</sup> ) | 1.03      |
| 12G                                                                 | $\Delta$ UA-2S-GlcNS-6S                                            | 1.05      |
| 12H                                                                 | $\Delta$ UA-GlcNS-6S                                               | 0.96      |
| 12I                                                                 | $\Delta$ UA-2S-GlcNS                                               | 0.86      |
| 12J                                                                 | $\Delta$ UA-2S-GlcNAc-6S                                           | 0.93      |
| 12K                                                                 | $\Delta$ UA-GlcNAc-6S                                              | 2.13±0.56 |
| 12L                                                                 | $\Delta$ UA-2S-GlcNAc                                              | 0.95      |
| 12M                                                                 | $\Delta$ UA-GlcNAc                                                 | 1.16      |
| 12N                                                                 | $\Delta$ UA-GalNAc-4S (Delta Di-4S)                                | 1.27      |
| 12O                                                                 | $\Delta$ UA-GalNAc-6S (Delta Di-6S)                                | 0.78      |
| 12P                                                                 | $\Delta$ UA-GalNAc-4S,6S (Delta Di-disE)                           | 0.68      |
| 13A                                                                 | $\Delta$ UA-2S-GalNAc-4S (Delta Di-disB)                           | 0.90      |
| 13B                                                                 | $\Delta$ UA-2S-GalNAc-6S (Delta Di-disD)                           | 0.86      |
| 13C                                                                 | $\Delta$ UA-2S-GalNAc-4S-6S (Delta Di-tisS)                        | 0.73      |
| 13D                                                                 | $\Delta$ UA-2S-GalNAc-6S (Delta Di-UA2S)                           | 0.87      |
| 13E                                                                 | $\Delta$ UA-GlcNAc (Delta Di-HA)                                   | 0.81      |
| 14M                                                                 | $\Delta$ UA $\rightarrow$ 2S-GlcN-6S                               | 4.32±0.86 |
| 14N                                                                 | $\Delta$ UA $\rightarrow$ GlcN-6S                                  | 0.89      |
| 14O                                                                 | $\Delta$ UA $\rightarrow$ 2S-GlcN                                  | 0.95      |
| 14P                                                                 | $\Delta$ UA $\rightarrow$ GlcN                                     | 0.92      |

| High molecular weight Carageenan and Glycoaminoglycans (GAGS) |                                                                                                                                                                                                                                         |                 |
|---------------------------------------------------------------|-----------------------------------------------------------------------------------------------------------------------------------------------------------------------------------------------------------------------------------------|-----------------|
| 625                                                           | (GlcA $\beta$ 1-4GlcNAc $\beta$ 1-3) <sub>8</sub> -NH <sub>2</sub> -ol                                                                                                                                                                  | 1.02            |
| 13F                                                           | (GlcA $\beta$ 1-3GlcNAc $\beta$ 1-4) <sub>n</sub> (n=4)                                                                                                                                                                                 | 1.02            |
| 13G                                                           | (GlcA $\beta$ 1-3GlcNAc $\beta$ 1-4) <sub>n</sub> (n=8)                                                                                                                                                                                 | 1.11            |
| 13H                                                           | (GlcA $\beta$ 1-3GlcNAc $\beta$ 1-4) <sub>n</sub> (n=10)                                                                                                                                                                                | 1.07            |
| 13I                                                           | (GlcA $\beta$ 1-3GlcNAc $\beta$ 1-4) <sub>n</sub> (n=12)                                                                                                                                                                                | 2.49 $\pm$ 0.52 |
| 13J                                                           | (GlcA/IdoA $\alpha$ / $\beta$ 1-4GlcNAc $\alpha$ 1-4) <sub>n</sub> (n=200)                                                                                                                                                              | 0.88            |
| 13K                                                           | (GlcA/IdoA $\beta$ 1-3( $\pm$ 4/6S)GalNAc $\beta$ 1-4) <sub>n</sub> (n<250)                                                                                                                                                             | 3.78 $\pm$ 0.88 |
| 13L                                                           | (( $\pm$ 2S)GlcA/IdoA $\alpha$ /b1-3( $\pm$ 4S)GalNAc $\beta$ 1-4) <sub>n</sub> (n<250)                                                                                                                                                 | 0.78            |
| 13M                                                           | (GlcA/IdoA $\beta$ 1-3( $\pm$ 6S)GalNAc $\beta$ 1-4) <sub>n</sub> (n<250)                                                                                                                                                               | 1.11            |
| 13N                                                           | HA - 4                                                                                                                                                                                                                                  | 2.21 $\pm$ 0.91 |
| 13O                                                           | HA - 6                                                                                                                                                                                                                                  | 1.40            |
| 13P                                                           | HA - 8                                                                                                                                                                                                                                  | 0.97            |
| 14A                                                           | HA 10                                                                                                                                                                                                                                   | 0.30            |
| 14B                                                           | HA-12                                                                                                                                                                                                                                   | 0.83            |
| 14C                                                           | HA-14                                                                                                                                                                                                                                   | 1.37            |
| 14D                                                           | HA-16                                                                                                                                                                                                                                   | 1.43            |
| 14E                                                           | HA 30000 da                                                                                                                                                                                                                             | 1.35            |
| 14F                                                           | HA 107000 da                                                                                                                                                                                                                            | 0.78            |
| 14G                                                           | HA 190000 da                                                                                                                                                                                                                            | 0.60            |
| 14H                                                           | HA 220000 da                                                                                                                                                                                                                            | 0.71            |
| 14I                                                           | HA 1600000 da                                                                                                                                                                                                                           | 0.86            |
| 14J                                                           | Heparin sulfate                                                                                                                                                                                                                         | 4.56 $\pm$ 1.28 |
| 14K                                                           | $\beta$ 1-3Glucan                                                                                                                                                                                                                       | 1.01            |
| Complex N-glycans                                             |                                                                                                                                                                                                                                         |                 |
| 627                                                           | (Sia2-6A-GN-M) <sub>2</sub> -3,6-M-GN-GN $\beta$ -sp4                                                                                                                                                                                   | 1.69            |
| 19A                                                           | Gal $\beta$ 1-4GlcNAc $\beta$ 1-2Man $\alpha$ 1-3(Gal $\beta$ 1-4GlcNAc $\beta$ 1-2Man $\alpha$ 1-6Man) $\beta$ 1-4GlcNAc $\beta$ 1-4(Fuca1-6)GlcNAc                                                                                    | 1.19            |
| 19B                                                           | Gal $\beta$ 1-4GlcNAc $\beta$ 1-2(Gal $\beta$ 1-4GlcNAc $\beta$ 1-4)Man $\alpha$ 1-3(Gal $\beta$ 1-4GlcNAc $\beta$ 1-2(Gal $\beta$ 1-4GlcNAc $\beta$ 1-6)Man $\alpha$ 1-6Man) $\beta$ 1-4GlcNAc $\beta$ 1-4GlcNAc                       | 0.97            |
| 19C                                                           | Neu5Ac $\alpha$ 2-6Gal $\beta$ 1-4GlcNAc $\beta$ 1-2Man $\alpha$ 1-3(Gal $\beta$ 1-4GlcNAc $\beta$ 1-2Man $\alpha$ 1-6)Man $\beta$ 1-4GlcNAc $\beta$ 1-4GlcNAc                                                                          | 1.52            |
| 19D                                                           | Neu5Ac $\alpha$ 2-6Gal $\beta$ 1-4GlcNAc $\beta$ 1-2Man $\alpha$ 1-3(Neu5Ac $\alpha$ 2-6Gal $\beta$ 1-4GlcNAc $\beta$ 1-2Man $\alpha$ 1-6)Man $\beta$ 1-4GlcNAc $\beta$ 1-4GlcNAc                                                       | 1.58            |
| 19E                                                           | Gal $\beta$ 1-4GlcNAc $\beta$ 1-2Man $\alpha$ 1-3(Gal $\beta$ 1-4GlcNAc $\beta$ 1-2Man $\alpha$ 1-6)Man $\beta$ 1-4GlcNAc $\beta$ 1-4GlcNAc                                                                                             | 0.84            |
| 19F                                                           | Neu5Ac $\alpha$ 2-6Gal $\beta$ 1-4GlcNAc $\beta$ 1-2Man $\alpha$ 1-3(Neu5Ac $\alpha$ 2-6Gal $\beta$ 1-4GlcNAc $\beta$ 1-2Man $\alpha$ 1-6)Man $\beta$ 1-4GlcNAc $\beta$ 1-4(Fuca1-6)GlcNAc                                              | 1.82            |
| 19G                                                           | Neu5Ac $\alpha$ 2-6Gal $\beta$ 1-4GlcNAc $\beta$ 1-2(Neu5Ac $\alpha$ 2-6Gal $\beta$ 1-4GlcNAc $\beta$ 1-4)Man $\alpha$ 1-3(Neu5Ac $\alpha$ 2-6Gal $\beta$ 1-4GlcNAc $\beta$ 1-2Man $\alpha$ 1-6)Man $\beta$ 1-4GlcNAc $\beta$ 1-4GlcNAc | 1.93            |
| 19H                                                           | GlcNAc $\beta$ 1-2(GlcNAc $\beta$ 1-4)Man $\alpha$ 1-3(GlcNAc $\beta$ 1-2Man $\alpha$ 1-6)GlcNAc $\beta$ 1-4Man $\beta$ 1-4GlcNAc $\beta$ 1-4GlcNAc                                                                                     | 0.61            |

Red/blue indicates binding. Binding is determined by positive interaction in three replicate array experiments. Positive interactions are determined by a background subtracted fluorescence value significantly above (greater than 2-fold) BL21 not expressing Hia protein.
